# Supplementary material for: Structural diversity of complexes between Cu(ii) or Ni(ii) and endocyclic oxygen- or nitrogen-containing ligands: synthesis, X-ray structure determinations and circular dichroism spectra
Source: Royal Society of Chemistry journal article supplement (doi:10.1039/c0ce00323a), 2010-01-01
Supplement: c0ce00323a.pdf [file c0ce00323a.pdf]

## Structural diversity of complexes between Cu(II) or Ni(II) and endocyclic oxygen- or nitrogen-containing ligands: Synthesis, X-ray structure determinations and circular dichroism spectra

Marina Fainerman-Melnikova,<sup>a</sup> Jack K. Clegg,<sup>a</sup> Amalie A. H. Pakchung,<sup>a</sup> Paul Jensen<sup>a</sup> and Rachel Codd<sup>a,b</sup>

Electronic Supplementary Information

Crystallography

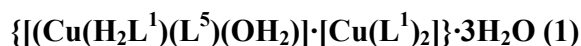

**Table S1.** Hydrogen Bond Geometry

| D     | H      | A                    | D-H (Å)   | H-A (Å)   | D-A (Å)    | DHA (°)   |
|-------|--------|----------------------|-----------|-----------|------------|-----------|
| O(1)  | H(1O)  | O(3W) <sup>i</sup>   | 0.840(12) | 1.614(13) | 2.4376(15) | 166.3(19) |
| O(4)  | H(2O)  | O(4W) <sup>iii</sup> | 0.832(19) | 1.626(19) | 2.4515(16) | 172(2)    |
| O(1W) | H(3O)  | O(12) <sup>iii</sup> | 0.77(2)   | 1.88(2)   | 2.6524(15) | 179(2)    |
| O(1W) | H(4O)  | O(2W)                | 0.81(2)   | 1.84(2)   | 2.6393(16) | 166.5(19) |
| O(2W) | H(5O)  | O(5) <sup>ii</sup>   | 0.78(2)   | 1.93(2)   | 2.6987(16) | 171.9(19) |
| O(2W) | H(6O)  | O(8) <sup>i</sup>    | 0.840(11) | 2.118(7)  | 2.9201(17) | 159.6(17) |
| O(3W) | H(7O)  | O(8)                 | 0.79(2)   | 1.79(2)   | 2.5697(16) | 174(2)    |
| O(3W) | H(8O)  | O(6) <sup>ii</sup>   | 0.78(2)   | 1.82(2)   | 2.5938(15) | 172(2)    |
| O(4W) | H(9O)  | O(9) <sup>iv</sup>   | 0.76(2)   | 1.89(2)   | 2.6309(16) | 163(2)    |
| O(4W) | H(10O) | O(7)                 | 0.77(2)   | 1.94(2)   | 2.7064(16) | 173(2)    |

Symmetry Operator

<sup>i</sup> -x+1, -y, -z+1 <sup>ii</sup> -x, y, z <sup>iii</sup> -x+1, -y+1, -z+1 <sup>iv</sup> -x+2, y, z

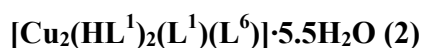

**Table S2.** Hydrogen Bond Geometry

| D     | H      | A                     | D-H (Å)   | H-A (Å)   | D-A (Å)  | DHA (°) |
|-------|--------|-----------------------|-----------|-----------|----------|---------|
| O(2)  | H(2O)  | O(21) <sup>iii</sup>  | 0.84(3)   | 1.72(2)   | 2.555(3) | 171(3)  |
| O(10) | H(10O) | O(4W) <sup>iv</sup>   | 0.84(3)   | 1.64(3)   | 2.449(3) | 160(4)  |
| O(16) | H(16O) | O(11) <sup>vii</sup>  | 0.84(3)   | 1.71(2)   | 2.546(3) | 173(4)  |
| O(24) | H(24O) | O(2W) <sup>v</sup>    | 0.84(3)   | 1.69(3)   | 2.529(3) | 173(4)  |
| O(1W) | H(1W)  | O(9W) <sup>iii</sup>  | 0.891(14) | 1.834(11) | 2.702(3) | 164(4)  |
| O(1W) | H(2W)  | O(20)                 | 0.89(3)   | 1.84(3)   | 2.703(3) | 165(4)  |
| O(2W) | H(3W)  | O(12) <sup>viii</sup> | 0.89(3)   | 1.94(2)   | 2.818(3) | 171(3)  |
| O(2W) | H(4W)  | O(3W) <sup>viii</sup> | 0.89(3)   | 1.81(3)   | 2.699(3) | 175(3)  |
| O(3W) | H(5W)  | O(1W) <sup>ii</sup>   | 0.89(3)   | 1.951(17) | 2.769(3) | 152(3)  |

|        |        |                        |         |           |          |        |
|--------|--------|------------------------|---------|-----------|----------|--------|
| O(3W)  | H(6W)  | O(4)                   | 0.89(3) | 1.99(3)   | 2.867(3) | 166(3) |
| O(4W)  | H(7W)  | O(6W) <sup>ix</sup>    | 0.89(3) | 1.72(3)   | 2.601(3) | 169(4) |
| O(4W)  | H(8W)  | O(8W) <sup>x</sup>     | 0.89(3) | 1.80(3)   | 2.660(4) | 163(4) |
| O(5W)  | H(9W)  | O(14) <sup>vi</sup>    | 0.89(3) | 2.06(2)   | 2.845(3) | 146(4) |
| O(5W)  | H(10W) | O(7) <sup>ii</sup>     | 0.89(3) | 2.266(17) | 3.105(3) | 157(4) |
| O(6W)  | H(11W) | O(22)                  | 0.89(3) | 1.838(10) | 2.708(3) | 165(4) |
| O(6W)  | H(12W) | O(14)                  | 0.89(3) | 1.93(2)   | 2.807(3) | 167(4) |
| O(7W)  | H(13W) | O(8)                   | 0.89(3) | 1.80(4)   | 2.678(4) | 169(5) |
| O(7W)  | H(14W) | O(8W) <sup>xi</sup>    | 0.89(3) | 2.03(3)   | 2.910(4) | 170(5) |
| O(8W)  | H(15W) | O(5W)                  | 0.89(3) | 1.916(16) | 2.766(4) | 159(4) |
| O(8W)  | H(16W) | O(7W) <sup>i</sup>     | 0.89(3) | 1.853(10) | 2.731(4) | 168(4) |
| O(9W)  | H(17W) | O(1W) <sup>xii</sup>   | 0.89(3) | 2.05(3)   | 2.879(3) | 156(3) |
| O(9W)  | H(18W) | O(10W) <sup>xiii</sup> | 0.89(3) | 1.95(3)   | 2.799(4) | 159(3) |
| O(10W) | H(19W) | O(19) <sup>ii</sup>    | 0.89(3) | 2.14(4)   | 3.008(3) | 165(4) |
| O(10W) | H(20W) | O(4)                   | 0.89(3) | 2.00(2)   | 2.815(3) | 151(4) |
| O(11W) | H(21W) | O(7W) <sup>xiv</sup>   | 0.89(3) | 1.99(5)   | 2.835(5) | 159(6) |
| O(11W) | H(22W) | O(14) <sup>ix</sup>    | 0.89(3) | 2.34(5)   | 3.020(4) | 133(5) |
| O(11W) | H(22W) | O(6W) <sup>ix</sup>    | 0.89(3) | 2.63(3)   | 3.463(4) | 156(5) |

#### Symmetry Operators

<sup>i</sup> -x+1, y+1/2, -z+3/2 <sup>ii</sup> -x+1, -y+1, -z+1 <sup>iii</sup> x, -y+1/2, z-1/2 <sup>iv</sup> x, y-1, z <sup>v</sup> x, y+1, z  
<sup>vi</sup> x-1, y, z <sup>vii</sup> x, -y+3/2, z+1/2 <sup>viii</sup> x, -y+1/2, z+1/2 <sup>ix</sup> x, -y+3/2, z-1/2 <sup>x</sup> -x+1, -y+2, -z+1  
<sup>xi</sup> -x+1, -y+2, -z-1/2 <sup>xii</sup> -x+1, y-1/2, -z+3/2 <sup>xiii</sup> -x+1, -y, -z+1 <sup>xiv</sup> -x+2, -y+1, -z

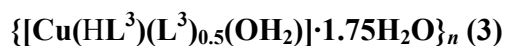

**Table S3.** Hydrogen Bond Geometry

| D      | H      | A                    | D-H (Å)    | H-A (Å)   | D-A (Å)    | DHA (°)    |
|--------|--------|----------------------|------------|-----------|------------|------------|
| O(5)   | H(10)  | O(10) <sup>iii</sup> | 0.839(19)  | 1.76(2)   | 2.5909(19) | 172(3)     |
| O(9)   | H(20)  | O(12)                | 0.870(19)  | 1.968(9)  | 2.811(4)   | 163(3)     |
| O(9)   | H(30)  | O(4) <sup>vi</sup>   | 0.870(13)  | 1.907(9)  | 2.7454(18) | 161(3)     |
| O(10)  | H(40)  | O(4)                 | 0.870(13)  | 1.949(6)  | 2.8079(17) | 169(3)     |
| O(10)  | H(50)  | O(1)                 | 0.868(16)  | 1.944(16) | 2.8113(19) | 179(3)     |
| O(10)  | H(50)  | O(3)                 | 0.868(16)  | 2.56(2)   | 3.0021(19) | 112(2)     |
| O(11)  | H(60)  | O(9)                 | 0.804(13)  | 1.812(4)  | 2.682(4)   | 179(4)     |
| O(11)  | H(70)  | O(7) <sup>iv</sup>   | 0.870(1)   | 2.446(2)  | 2.932(3)   | 115.88(11) |
| O(11)  | H(70)  | O(7) <sup>v</sup>    | 0.870(1)   | 2.446(2)  | 2.932(3)   | 115.88(11) |
| O(11)  | H(70)  | O(8) <sup>iv</sup>   | 0.870(1)   | 2.444(5)  | 3.314(5)   | 180.000(1) |
| O(11A) | H(601) | O(9) <sup>i</sup>    | 0.870(1)   | 1.93(3)   | 2.771(6)   | 163(11)    |
| O(11A) | H(601) | O(12) <sup>iii</sup> | 0.870(1)   | 2.63(11)  | 3.059(7)   | 112(9)     |
| O(11A) | H(701) | O(7) <sup>v</sup>    | 0.870(1)   | 2.525(4)  | 3.015(6)   | 116.4(4)   |
| O(11A) | H(701) | O(8) <sup>iv</sup>   | 0.870(1)   | 2.614(9)  | 3.322(7)   | 139.2(6)   |
| O(12)  | H(80)  | O(9) <sup>ii</sup>   | 0.8698(10) | 2.25(4)   | 2.993(4)   | 143(6)     |

|       |       |                     |            |         |           |        |
|-------|-------|---------------------|------------|---------|-----------|--------|
| O(12) | H(8O) | O(12) <sup>ii</sup> | 0.8698(10) | 2.50(6) | 3.111(10) | 128(6) |
| O(12) | H(9O) | O(10) <sup>vi</sup> | 0.8698(10) | 2.07(4) | 2.838(4)  | 147(6) |

#### Symmetry Operators

<sup>i</sup> -x, y, -z+1/2   <sup>ii</sup> -x, -y, -z+1   <sup>iii</sup> x, -y, z-1/2   <sup>iv</sup> -x+1/2, -y+1/2, -z+1   <sup>v</sup> x-1/2, -y+1/2, z-1/2  
<sup>vi</sup> -x, y, -z+3/2

#### Specific details:

The O(11) and O(11A) water molecules are disordered over 3 positions with a total occupancy of 1. Their isotropic thermal parameter was refined identically.

#### {[Cu(L<sup>4</sup>)(L<sup>7</sup>)]ClO<sub>4</sub>}<sub>n</sub> (4)

**Table S4.** Hydrogen Bond Geometry

| D    | H     | A                 | D-H( Å) | H-A( Å) | D-A( Å)  | DHA (°) |
|------|-------|-------------------|---------|---------|----------|---------|
| N(2) | H(1N) | O(7) <sup>i</sup> | 0.88(3) | 2.24(3) | 3.117(4) | 175(3)  |

#### Symmetry Operators

<sup>i</sup> x, -y+1/2, z-1/2

#### [Cu(L<sup>2</sup>)(OH<sub>2</sub>)<sub>4</sub>]<sub>n</sub> (5)

#### Specific details:

Although the crystals employed in this study appearing (at least visually) to be of good habit and free from imperfections, they proved not to be single and a two component twin, which was resolved using CELL\_NOW [Bruker-Nonius (2007), CELL\_NOW. Bruker AXS Inc. Madison, Wisconsin, USA], TWINABS [G. M. Sheldrick, *TWINABS: Empirical Absorption and Correction Software*, University of Göttingen, Germany, 1999-2007] and SAINT [Bruker-Nonius, SAINT v.7 Bruker AXS Inc. Madison, Wisconsin, USA, 2007].

**Table S5.** Hydrogen Bond Geometry

| D    | H     | A                 | D-H( Å) | H-A( Å) | D-A( Å)  | DHA (°) |
|------|-------|-------------------|---------|---------|----------|---------|
| O(7) | H(2O) | O(1) <sup>i</sup> | 0.84(2) | 1.91(2) | 2.748(2) | 176(3)  |
| O(7) | H(1O) | O(3) <sup>i</sup> | 0.84(2) | 2.60(3) | 3.004(2) | 111(2)  |

|       |       |                     |         |           |          |        |
|-------|-------|---------------------|---------|-----------|----------|--------|
| O(7)  | H(10) | O(5) <sup>i</sup>   | 0.84(2) | 1.88(2)   | 2.716(2) | 178(3) |
| O(7)  | H(10) | O(3) <sup>i</sup>   | 0.84(2) | 2.60(3)   | 3.004(2) | 111(2) |
| O(8)  | H(40) | O(2) <sup>iv</sup>  | 0.84(2) | 2.38(3)   | 2.825(3) | 114(3) |
| O(8)  | H(30) | O(4) <sup>ii</sup>  | 0.84(2) | 2.021(18) | 2.787(3) | 151(3) |
| O(9)  | H(60) | O(8)                | 0.84(2) | 1.84(2)   | 2.669(2) | 172(3) |
| O(9)  | H(50) | O(5) <sup>iii</sup> | 0.84(2) | 1.78(2)   | 2.613(2) | 172(3) |
| O(10) | H(80) | O(4) <sup>ii</sup>  | 0.84(2) | 1.86(2)   | 2.699(2) | 171(3) |
| O(10) | H(70) | O(6) <sup>v</sup>   | 0.84(2) | 1.84(3)   | 2.674(2) | 174(3) |

### Symmetry Operators

<sup>i</sup> -x, -y+1, -z <sup>ii</sup> x, y+1, z <sup>iii</sup> x+1, y, z <sup>iv</sup> -x+1, -y+1, -z <sup>v</sup> -x-1, -y+1, -z+1

### [Ni(HL<sup>2</sup>)<sub>2</sub>(OH<sub>2</sub>)<sub>4</sub>] (6)

**Table S6.** Hydrogen Bond Geometry

| D    | H     | A                   | D-H( Å) | H-A( Å) | D-A( Å)    | DHA ( °) |
|------|-------|---------------------|---------|---------|------------|----------|
| O(7) | H(20) | O(4) <sup>i</sup>   | 0.74(3) | 2.12(3) | 2.7808(19) | 149(3)   |
| O(7) | H(30) | O(2) <sup>iii</sup> | 0.80(3) | 1.89(3) | 2.687(2)   | 173(2)   |
| O(8) | H(40) | O(2) <sup>iv</sup>  | 0.79(2) | 2.00(3) | 2.6939(19) | 146(2)   |
| O(8) | H(50) | O(7) <sup>i</sup>   | 0.86(3) | 1.95(3) | 2.7943(19) | 168(2)   |
| O(5) | H(10) | O(6) <sup>ii</sup>  | 0.87(3) | 1.84(3) | 2.703(2)   | 171(2)   |

### Symmetry Operator

<sup>i</sup> -x+1, -y, -z+1 <sup>ii</sup> x+1, y-1, z <sup>iii</sup> -x, -y+1, -z+1 <sup>iv</sup> -x, -y, -z+1
